# Supplementary material for: Computational Studies of the Structural Basis of Human RPS19 Mutations Associated With Diamond-Blackfan Anemia
Source: Frontiers journal article supplement (doi:10.3389/fgene.2021.650897), 2021-05-24
Supplement: Image_2.PDF [file Image_2.PDF]

## *Supplementary Material*

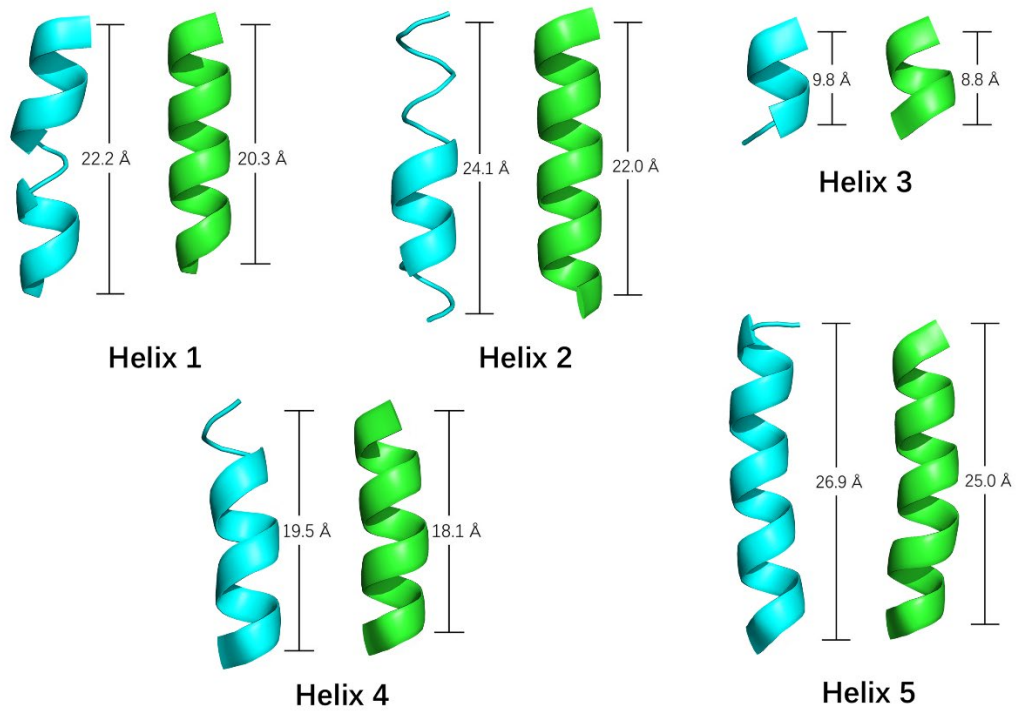

**Supplementary Figure 2.** The comparison of helix regions from the packed state (blue) and free state (green). The start and end residues of helices were defined according to the free state conformation. The spatial length of helices was measured by the distance between C $\alpha$  of the two terminal residues.
