# Supplementary material for: Computational Studies of the Structural Basis of Human RPS19 Mutations Associated With Diamond-Blackfan Anemia
Source: Front Genet. 2021 May 24;12:650897. doi: 10.3389/fgene.2021.650897 (PMC8181406; doi:10.3389/fgene.2021.650897)
Supplement: Supplementary file 4 [file Table_2.XLSX]

## Sheet: Table S2 DBA mutations of RPS19
Supplementary Table 2. DBA-associated RPS19 Mutations
Mutation#	WT	Position	MT	Exon	DNA Change	Secondary Structure	Used for SVM training	Consurf_Score*	BSA*	rBSA*	HB_Num*	WT_Charge*	Delta_Charge*	WT_Hydrophobicity*	Delta_Hydrophobicity*	DDG*	WT_Helix*	Delta_Helix*	WT_Volume*	Delta_Volume*	Intra_HB_Num*	rSASA*	Blosum62*	WT_Disorder*	Delta_Disorder*	Source	RPS19-SVM Cross-validation	Pmut Prediction	Mutpred2 Prediction	PolyPhen2 Prediction	SIFT Prediction
Val9Glu	Val	9	Glu	2	c.26T>A	coil	N	-1.111	12.37	0.506137	0	0	-1	0.86	-0.24	4.19429	2	1	140	-1.6	2	0.149425	-2	0.2963	0.1153	Literatures (PMID: 24675553)	-	-	-	-	-
Val15Phe	Val	15	Phe	2	c.43G>T	helix	Y	-0.581	21.59	0.962979	0	0	0	0.86	0.02	1.54877	2	0	140	49.9	1	0.114943	-1	0.1205	-0.0214	dbagenes, ClinVar, Literatures (PMID: 12586610; 10590074)	Disease	Disease	Disease	Disease	Disease
Ala17Pro	Ala	17	Pro	2	c.49G>C	helix	Y	-0.007	0	0	0	0	0	0.74	-0.1	0.619686	3	-5	88.6	24.1	0	0.44186	-1	0.1766	0.0792	dbagenes, ClinVar, Literatures (PMID: 20960466; 29044489; 21659346)	Disease	Disease	Disease	Disease	Neutral
Leu18Pro	Leu	18	Pro	2	c.53T>C	helix	Y	0.161	0	0	0	0	0	0.85	-0.21	3.93921	3	-5	166.7	-54	1	0.0547264	-3	0.115	0.1235	dbagenes, Literatures (PMID: 11112378)	Disease	Disease	Disease	Disease	Disease
Leu18Arg	Leu	18	Arg	2	c.53T>G	helix	N	0.161	0	0	0	0	1	0.85	-0.21	3.54106	3	-3	166.7	6.7	1	0.0547264	-2	0.115	0.0891	dbagenes, Literatures (PMID: 15384984)	-	-	-	-	-
Ala20Pro	Ala	20	Pro	2	c.58G>C	helix	Y	0.543	0	0	0	0	0	0.74	-0.1	0.0700745	3	-5	88.6	24.1	1	0.488372	-1	0.1117	0.0581	dbagenes, Literatures (PMID: 20960466; 22381658)	Disease	Disease	Disease	Disease	Neutral
Phe21Ser	Phe	21	Ser	2	c.62T>C	helix	Y	-0.144	0	0	0	0	0	0.88	-0.22	1.02074	2	-2	189.9	-100.9	1	0.329167	-2	0.124	0.1052	dbagenes, Literatures (PMID: 18412286)	Disease	Disease	Disease	Disease	Disease
Lys23Arg	Lys	23	Arg	2	c.68A>G	helix	N	-1.146	0	0	0	1	0	0.52	0.12	0.318585	1	-1	168.6	4.8	2	0.364407	2	0.0723	0	ClinVar	-	-	-	-	-
Leu28Arg	Leu	28	Arg	3	c.83T>G	coil	N	0.917	0	0	0	0	1	0.85	-0.21	2.32421	3	-3	166.7	6.7	1	0.238806	-2	0.0991	0.0707	dbagenes, Literatures (PMID: 20960466)	-	-	-	-	-
Lys38Asn	Lys	38	Asn	3	c.114G>C	coil	N	-1.192	68.59	0.993194	1	1	-1	0.52	0.11	0.0603607	1	-2	168.6	-54.5	0	0.300847	0	0.1041	0.0047	Literatures (PMID: 25946618)	-	-	-	-	-
Pro47Thr	Pro	47	Thr	3	c.139C>A	coil	N	-1.083	35.86	0.732584	0	0	0	0.64	0.06	3.07584	-2	2	112.7	3.4	0	0.308176	-1	0.0965	-0.0221	Literatures (PMID: 29114930)	-	-	-	-	-
Pro47Ser	Pro	47	Ser	3	c.139C>T	coil	N	-1.083	35.86	0.732584	0	0	0	0.64	0.02	1.75067	-2	2	112.7	-23.7	0	0.308176	-1	0.0965	-0.0221	ClinVar	-	-	-	-	-
Pro47Leu	Pro	47	Leu	3	c.140C>T	coil	Y	-1.083	35.86	0.732584	0	0	0	0.64	0.21	0.581323	-2	5	112.7	54	0	0.308176	-3	0.0965	-0.056	dbagenes, Literatures (PMID: 11112378; 20960466; 17376718)	Disease	Disease	Disease	Disease	Disease
Trp52Arg	Trp	52	Arg	3	c.154T>C	helix	Y	-1.185	9.84	0.558456	0	0	1	0.85	-0.21	4.34984	2	-2	227.8	-54.4	4	0.0666667	-3	0.1844	0.1302	dbagenes, Literatures (PMID: 10590074; 20960466; 9988267)	Disease	Disease	Disease	Disease	Disease
Trp52Cys	Trp	52	Cys	3	c.156G>C	helix	Y	-1.185	9.84	0.558456	0	0	0	0.85	0.06	2.78052	2	-2	227.8	-119.3	4	0.0666667	-2	0.1844	0.0278	dbagenes, Literatures (PMID: 18412286; 18768533)	Disease	Disease	Disease	Disease	Disease
Thr55Met	Thr	55	Met	3	c.164C>T	helix	N	0.964	25.51	0.603216	0	0	0	0.7	0.15	-1.53972	0	2	116.1	46.8	1	0.25	-1	0.0909	-0.0302	ClinVar, Literatures (PMID: 12586610)	-	-	-	-	-
Arg56Pro	Arg	56	Pro	3	c.167G>C	helix	N	-1.132	8.38	0.636778	0	1	-1	0.64	0	6.20859	0	-2	173.4	-60.7	1	0.0437956	-2	0.1041	0.0225	Literatures (PMID: 27601194)	-	-	-	-	-
Arg56Gln	Arg	56	Gln	3	c.167G>A	helix	Y	-1.132	8.38	0.636778	0	1	-1	0.64	-0.02	0.135238	0	2	173.4	-29.6	1	0.0437956	1	0.1041	0.0137	dbagenes, Literatures (PMID: 10590074; 10753603; 15059149; 18412286; 20960466; 11264183; 12586610; 15384984; 22381658)	Disease	Disease	Disease	Disease	Disease
Ala57Thr	Ala	57	Thr	3	c.169G>A	helix	Y	-0.22	0	0	0	0	0	0.74	-0.04	0.633472	3	-3	88.6	27.5	2	0.124031	0	0.124	0.0292	Literatures (PMID: 30503522)	Neutral	Disease	Disease	Neutral	Neutral
Ala57Pro	Ala	57	Pro	3	c.169G>C	helix	Y	-0.22	0	0	0	0	0	0.74	-0.1	0.0954827	3	-5	88.6	24.1	2	0.124031	-1	0.124	0.0526	dbagenes, Literatures (PMID: 15059149)	Disease	Disease	Disease	Disease	Disease
Ala58Pro	Ala	58	Pro	3	c.172G>C	helix	Y	-1.078	0	0	0	0	0	0.74	-0.1	-0.0767754	3	-5	88.6	24.1	0	0.0155039	-1	0.106	0.0542	dbagenes, Literatures (PMID: 20960466; 29114930)	Disease	Disease	Disease	Disease	Disease
Ser59Phe	Ser	59	Phe	4	c.176C>T	helix	N	-0.677	21.79	1	1	0	0	0.66	0.22	-0.87349	0	2	89	100.9	0	0.141935	-2	0.1635	-0.0822	dbagenes, Literatures (PMID: 15384984)	-	-	-	-	-
Thr60Pro	Thr	60	Pro	4	c.178A>C	helix	N	0.581	0	0	0	0	0	0.7	-0.06	6.06693	0	-2	116.1	-3.4	1	0.0290698	-1	0.1416	0.0282	dbagenes, ClinVar, Literatures (PMID: 20960466)	-	-	-	-	-
Ala61Glu	Ala	61	Glu	4	c.182C>A	helix	Y	0.084	0	0	0	0	-1	0.74	-0.12	1.69281	3	0	88.6	49.8	1	0.0232558	-1	0.138	0.0386	dbagenes, Literatures (PMID: 10590074; 15059149)	Disease	Disease	Disease	Disease	Disease
Arg62Trp	Arg	62	Trp	4	c.184C>T	helix	Y	-1.083	32.81	0.903359	2	1	-1	0.64	0.21	-1.33976	0	2	173.4	54.4	0	0.142336	-3	0.1018	-0.0554	dbagenes, ClinVar, Literatures (PMID: 11112378; 15384984; 15075082; 10590074; 9988267; 20960466; 12586610; 20378560; 25946618; 25424902; 29044489)	Disease	Neutral	Disease	Disease	Disease
Arg62Gln	Arg	62	Gln	4	c.185G>A	helix	Y	-1.083	32.81	0.903359	2	1	-1	0.64	-0.02	-0.231806	0	2	173.4	-29.6	0	0.142336	1	0.1018	0.0042	dbagenes, ClinVar, Literatures (PMID: 10753603; 12750732; 15384984; 20960466; 11264183; 20378560; 25424902; 27882484; 22381658)	Disease	Disease	Disease	Neutral	Disease
His63Pro	His	63	Pro	4	c.188A>C	helix	N	-0.655	13.88	0.337713	2	0	0	0.78	-0.14	1.50166	2	-4	153.2	-40.5	2	0.196429	-2	0.1602	0.0242	Literatures (PMID: 27408399)	-	-	-	-	-
Leu64Arg	Leu	64	Arg	4	c.191T>G	helix	Y	0.033	0	0	0	0	1	0.85	-0.21	3.75422	3	-3	166.7	6.7	2	0.0348259	-2	0.2333	0.0978	Literatures (PMID: 30503522)	Disease	Disease	Disease	Disease	Disease
Leu64Pro	Leu	64	Pro	4	c.191T>C	helix	N	0.033	0	0	0	0	0	0.85	-0.21	0.840283	3	-5	166.7	-54	2	0.0348259	-3	0.2333	0.1202	dbagenes, Literatures (PMID: 16159874)	-	-	-	-	-
Arg67Pro	Arg	67	Pro	4	c.200G>C	helix	N	-0.476	143.44	0.770851	1	1	-1	0.64	0	4.42242	0	-2	173.4	-60.7	1	0.708029	-2	0.3053	0.0131	Literatures (PMID: 30503522)	-	-	-	-	-
Ala70Thr	Ala	70	Thr	4	c.208G>A	coil	N	0.078	9.03	0.618493	0	0	0	0.74	-0.04	1.26598	3	-3	88.6	27.5	1	0.100775	0	0.2255	0.0493	ClinVar	-	-	-	-	-
Gly71Glu	Gly	71	Glu	4	c.212G>A	coil	N	-1.196	23.46	0.963846	0	0	-1	0.72	-0.1	0.478252	-2	5	60.1	78.3	0	0.25	-2	0.2255	0.013	dbagenes, Literatures (PMID: 20960466)	-	-	-	-	-
Thr76Pro	Thr	76	Pro	4	c.226A>C	helix	N	0.375	0	0	0	0	0	0.7	-0.06	4.13829	0	-2	116.1	-3.4	0	0.0406977	-1	0.4333	0.0318	dbagenes, Literatures (PMID: 18412286)	-	-	-	-	-
Arg94Leu	Arg	94	Leu	4	c.281G>T	coil	N	1.129	29.42	0.262655	1	1	-1	0.64	0.21	-0.360735	0	3	173.4	-6.7	0	0.427007	-2	0.4967	-0.1028	dbagenes, Literatures (PMID: 20960466)	-	-	-	-	-
Gly95Val	Gly	95	Val	4	c.284G>T	coil	Y	0.191	6.87	0.484827	0	0	0	0.72	0.14	7.57227	-2	4	60.1	79.9	0	0.144231	-3	0.5008	-0.0763	Literatures (PMID: 20378560; 25424902)	Disease	Disease	Disease	Disease	Neutral
Ser96Pro	Ser	96	Pro	4	c.286T>C	coil	Y	-0.788	15.87	0.946333	0	0	0	0.66	-0.02	-2.06307	0	-2	89	23.7	1	0.103226	-1	0.4781	0.0303	Literatures (PMID: 30503522)	Disease	Disease	Disease	Disease	Disease
Arg101Cys	Arg	101	Cys	4	c.301C>T	helix	N	-1.132	75.68	0.995658	3	1	-1	0.64	0.27	0.791921	0	0	173.4	-64.9	1	0.266423	-3	0.4379	-0.1068	dbagenes, Literatures (PMID: 20960466)	-	-	-	-	-
Arg101His	Arg	101	His	4	c.302G>C	helix	Y	-1.132	75.68	0.995658	3	1	-1	0.64	0.14	1.48458	0	2	173.4	-20.2	1	0.266423	0	0.4379	0.0041	Literatures (PMID: 10590074; 15384984; 20960466; 11112378)	Disease	Neutral	Disease	Neutral	Disease
Arg101Pro	Arg	101	Pro	4	c.302G>A	helix	Y	-1.132	75.68	0.995658	3	1	-1	0.64	0	6.98432	0	-2	173.4	-60.7	1	0.266423	-2	0.4379	0.0272	dbagenes, Literatures (PMID: 30503522)	Disease	Disease	Disease	Disease	Disease
Arg102Pro	Arg	102	Pro	4	c.305G>C	helix	Y	-0.29	55.56	0.534282	2	1	-1	0.64	0	-0.250583	0	-2	173.4	-60.7	2	0.39781	-2	0.4078	0.0255	dbagenes, Literatures (PMID: 20960466)	Disease	Disease	Disease	Neutral	Neutral
Val103Asp	Val	103	Asp	4	c.308T>A	helix	N	-0.061	0	0	0	0	-1	0.86	-0.24	2.37395	2	-2	140	-28.9	0	0.0229885	-3	0.4282	0.0802	ClinVar	-	-	-	-	-
Leu107Arg	Leu	107	Arg	4	c.320T>A	helix	Y	-1.115	0	0	0	0	1	0.85	-0.21	1.80029	3	-3	166.7	6.7	1	0.039801	-2	0.4333	0.0896	Literatures (PMID: 20960466; 29114930)	Disease	Disease	Disease	Disease	Disease
Leu107Gln	Leu	107	Gln	4	c.320T>G	helix	Y	-1.115	0	0	0	0	0	0.85	-0.23	1.79097	3	-1	166.7	-22.9	1	0.039801	-2	0.4333	0.092	dbagenes, Literatures (PMID: 30503522)	Disease	Disease	Disease	Disease	Disease
Asp118Gly	Asp	118	Gly	4	c.353A>G	coil	Y	1.564	10.55	0.0746058	0	-1	1	0.62	0.1	0.0746034	0	-2	111.1	-51	0	0.803109	-1	0.6255	-0.0036	Literatures (PMID: 25424902)	Neutral	Neutral	Neutral	Neutral	Neutral
Gly120Arg	Gly	120	Arg	5	c.358G>C	coil	Y	-1.196	4.9	0.366492	0	0	1	0.72	-0.08	6.51139	-2	2	60.1	113.3	0	0.134615	-2	0.6374	0	dbagenes, Literatures (PMID: 10590074; 18768533)	Disease	Disease	Disease	Disease	Disease
Gly127Glu	Gly	127	Glu	5	c.379G>A	helix	Y	-1.196	0	0	0	0	-1	0.72	-0.1	17.1171	-2	5	60.1	78.3	0	0	-2	0.6516	0	Literatures (PMID: 10590074; 12586610; 31574871)	Disease	Disease	Disease	Disease	Disease
Gly127Arg	Gly	127	Arg	5	c.380G>A	helix	N	-1.196	0	0	0	0	1	0.72	-0.08	18.7165	-2	2	60.1	113.3	0	0	-2	0.6516	0.0041	dbagenes, ClinVar, Literatures (PMID: 29114930)	-	-	-	-	-
Leu131Arg	Leu	131	Arg	5	c.392T>G	helix	Y	-0.547	0	0	0	0	1	0.85	-0.21	4.20328	3	-3	166.7	6.7	1	0.0149254	-2	0.5667	0.1048	dbagenes, Literatures (PMID: 15384984; 11264183; 25946618)	Disease	Disease	Disease	Disease	Disease
Leu131Pro	Leu	131	Pro	5	c.392T>C	helix	Y	-0.547	0	0	0	0	0	0.85	-0.21	2.21716	3	-5	166.7	-54	1	0.0149254	-3	0.5667	0.1367	dbagenes, Literatures (PMID: 12750732; 18768533)	Disease	Disease	Disease	Disease	Disease
Ala135Thr	Ala	135	Thr	5	c.403G>A	helix	N	-1.04	0	0	0	0	0	0.74	-0.04	2.06724	3	-3	88.6	27.5	1	0	0	0.6604	0.0111	dbagenes, Literatures (PMID: 18412286)	-	-	-	-	-
Val138Leu	Val	138	Leu	5	c.412G>T	helix	Y	0.068	0	0	0	0	0	0.86	-0.01	-0.983366	3	1	140	26.7	1	0.247126	1	0.7275	-0.0128	Literatures (PMID: 30503522)	Neutral	Neutral	Disease	Neutral	Neutral
#:The reference gene model is ENST00000598742 (NM_001022.3).
*: The definition is described in Table S7.
