# Supplementary material for: Computational Studies of the Structural Basis of Human RPS19 Mutations Associated With Diamond-Blackfan Anemia
Source: Front Genet. 2021 May 24;12:650897. doi: 10.3389/fgene.2021.650897 (PMC8181406; doi:10.3389/fgene.2021.650897)
Supplement: Supplementary file 5 [file Table_3.XLSX]

## Sheet: Table S3 Neutral mutations
Supplementary Table 3. Neutral RPS19 Mutations
Mutation#	WT	Position	MT	Exon	DNA Change	2nd Structure	Flag for SVM training	Consurf_Score*	BSA*	rBSA*	HB_Num*	WT_Charge*	Delta_Charge*	WT_Hydrophobicity*	Delta_Hydrophobicity*	DDG*	WT_Helix*	Delta_Helix*	WT_Volume*	Delta_Volume*	Intra_HB_Num*	rSASA*	Blosum62*	WT_Disorder*	Delta_Disorder*	Source	RPS19-SVM Cross-validation	Pmut Prediction	Mutpred2 Prediction	PolyPhen2 Prediction	SIFT Prediction
Pro2Leu	Pro	2	Leu	2	c.5C>T	coil	Y	1.21	0.58	0.00320212	0	0	0	0.64	0.21	0.0753391	-2	5	112.7	54	0	1.11321	-3	0.8424	-0.1313	ExAC	Disease	Disease	Disease	Disease	Disease
Val4Phe	Val	4	Phe	2	c.10G>T	coil	Y	0.092	14.02	0.219474	0	0	0	0.86	0.02	0.179759	2	0	140	49.9	2	0.350575	-1	0.6789	-0.0232	ExAC	Neutral	Disease	Disease	Disease	Disease
Thr5Pro	Thr	5	Pro	2	c.13A>C	coil	Y	-0.663	53.67	0.926943	0	0	0	0.7	-0.06	-1.70892	0	-2	116.1	-3.4	0	0.337209	-1	0.5802	0.0491	ExAC	Neutral	Disease	Disease	Neutral	Disease
Phe14Leu	Phe	14	Leu	2	c.42C>A	helix	Y	-0.453	0	0	0	0	0	0.88	-0.03	1.21177	2	1	189.9	-23.2	1	0	0	0.0771	0.0138	ExAC	Neutral	Disease	Disease	Neutral	Neutral
Val15Ile	Val	15	Ile	2	c.43G>A	helix	Y	-0.581	21.59	0.962979	0	0	0	0.86	0.02	-0.798668	2	-1	140	26.7	1	0.114943	3	0.1205	-0.0187	ExAC	Neutral	Neutral	Neutral	Neutral	Neutral
Ala17Thr	Ala	17	Thr	2	c.49G>A	helix	Y	-0.007	0	0	0	0	0	0.74	-0.04	0.902674	3	-3	88.6	27.5	0	0.44186	0	0.1766	0.0275	ExAC	Neutral	Disease	Neutral	Neutral	Neutral
Ala20Val	Ala	20	Val	2	c.59C>T	helix	Y	0.543	0	0	0	0	0	0.74	0.12	1.31452	3	-1	88.6	51.4	1	0.488372	0	0.1117	-0.0304	ExAC	Neutral	Disease	Neutral	Neutral	Neutral
Lys24Asn	Lys	24	Asn	3	c.72G>C	helix	Y	-0.334	0	0	0	1	-1	0.52	0.11	0.199726	1	-2	168.6	-54.5	1	0.822034	0	0.0478	0.0036	ExAC	Neutral	Disease	Disease	Disease	Disease
Asp35Gly	Asp	35	Gly	3	c.104A>G	coil	Y	-0.595	93.36	0.674372	5	-1	1	0.62	0.1	0.00202556	0	-2	111.1	-51	1	0.746114	-1	0.1635	0	ExAC	Neutral	Disease	Disease	Disease	Disease
Val37Ile	Val	37	Ile	3	c.109G>A	coil	Y	-0.643	56.34	1	0	0	0	0.86	0.02	0.220439	2	-1	140	26.7	0	0.333333	3	0.1602	-0.0186	ExAC	Neutral	Disease	Neutral	Neutral	Neutral
Tyr48Phe	Tyr	48	Phe	3	c.143A>T	coil	Y	0.403	133.3	0.695975	3	0	0	0.76	0.12	0.059459	-1	3	193.6	-3.7	0	0.775665	3	0.1205	-0.0055	ExAC	Neutral	Disease	Neutral	Neutral	Neutral
Thr55Ala	Thr	55	Ala	3	c.163A>G	helix	Y	0.964	25.51	0.603216	0	0	0	0.7	0.04	-1.1533	0	3	116.1	-27.5	1	0.25	0	0.0909	-0.0208	ExAC	Neutral	Disease	Disease	Neutral	Neutral
Thr60Ala	Thr	60	Ala	4	c.178A>G	helix	Y	0.581	0	0	0	0	0	0.7	0.04	1.83941	0	3	116.1	-27.5	1	0.0290698	0	0.1416	-0.0266	ExAC	Neutral	Disease	Disease	Neutral	Disease
Thr60Ile	Thr	60	Ile	4	c.179C>T	helix	Y	0.581	0	0	0	0	0	0.7	0.18	-0.251872	0	1	116.1	50.6	1	0.0290698	-1	0.1416	-0.0672	ExAC	Neutral	Neutral	Disease	Neutral	Neutral
His63Gln	His	63	Gln	4	c.189C>G	helix	Y	-0.655	13.88	0.337713	2	0	0	0.78	-0.16	-0.106391	2	0	153.2	-9.4	2	0.196429	0	0.1602	0.0065	ExAC	Neutral	Disease	Disease	Disease	Neutral
Thr76Ala	Thr	76	Ala	4	c.226A>G	helix	Y	0.375	0	0	0	0	0	0.7	0.04	0.950362	0	3	116.1	-27.5	0	0.0406977	0	0.4333	-0.0486	ExAC	Neutral	Neutral	Disease	Neutral	Neutral
Tyr79Cys	Tyr	79	Cys	4	c.236A>G	coil	Y	-0.665	20.44	0.445704	0	0	0	0.76	0.15	1.15409	-1	1	193.6	-85.1	0	0.171103	-2	0.4282	0.0051	ExAC	Neutral	Disease	Disease	Disease	Disease
Arg82His	Arg	82	His	4	c.245G>A	strand	Y	0.256	102.77	0.670998	2	1	-1	0.64	0.14	0.396336	0	2	173.4	-20.2	0	0.565693	0	0.4078	-0.0041	ExAC	Neutral	Neutral	Disease	Neutral	Neutral
Val87Ile	Val	87	Ile	4	c.259G>A	coil	Y	0.107	140.92	0.909396	0	0	0	0.86	0.02	-0.0164473	2	-1	140	26.7	0	0.862069	3	0.5296	-0.017	ExAC	Neutral	Disease	Neutral	Neutral	Neutral
Met88Ile	Met	88	Ile	4	c.264G>C	strand	Y	1.2	84.71	0.621406	0	0	0	0.85	0.03	1.3628	2	-1	162.9	3.8	0	0.607143	1	0.5253	-0.0602	ExAC	Neutral	Neutral	Neutral	Neutral	Neutral
Arg94Gln	Arg	94	Gln	4	c.281G>A	coil	Y	1.129	29.42	0.262655	1	1	-1	0.64	-0.02	0.00702748	0	2	173.4	-29.6	0	0.427007	1	0.4967	0.0041	ExAC	Neutral	Neutral	Neutral	Disease	Neutral
Arg102Gln	Arg	102	Gln	4	c.305G>A	helix	Y	-0.29	55.56	0.534282	2	1	-1	0.64	-0.02	-0.236199	0	2	173.4	-29.6	2	0.39781	1	0.4078	0	ExAC	Neutral	Neutral	Neutral	Neutral	Neutral
Gln105Arg	Gln	105	Arg	4	c.314A>G	helix	Y	-0.954	31.77	0.325946	1	0	1	0.62	0.02	0.745921	2	-2	143.8	29.6	1	0.417778	1	0.4245	-0.0096	ExAC	Neutral	Disease	Disease	Neutral	Disease
Ala106Thr	Ala	106	Thr	4	c.316G>A	helix	Y	0.014	0	0	0	0	0	0.74	-0.04	-0.104881	3	-3	88.6	27.5	0	0.162791	0	0.4282	0.0318	ExAC	Neutral	Disease	Disease	Neutral	Neutral
Asp118Glu	Asp	118	Glu	4	c.354T>A	coil	Y	1.564	10.55	0.0746058	0	-1	0	0.62	0	0.137092	0	3	111.1	27.3	0	0.803109	2	0.6255	-0.0081	ExAC	Neutral	Neutral	Neutral	Neutral	Neutral
Lys122Arg	Lys	122	Arg	5	c.365A>G	strand	Y	1.354	30.18	0.257662	1	1	0	0.52	0.12	0.174569	1	-1	168.6	4.8	1	0.529661	2	0.6412	0.0062	ExAC	Neutral	Neutral	Neutral	Neutral	Neutral
Pro125Thr	Pro	125	Thr	5	c.373C>A	helix	Y	0.741	41.16	0.385682	0	0	0	0.64	0.06	1.97363	-2	2	112.7	3.4	5	0.628931	-1	0.6442	-0.064	ExAC	Neutral	Disease	Neutral	Neutral	Neutral
Gly136Arg	Gly	136	Arg	5	c.406G>A	helix	Y	1.31	0	0	0	0	1	0.72	-0.08	-0.104238	-2	2	60.1	113.3	0	0.25	-2	0.6604	0.0152	ExAC	Neutral	Neutral	Disease	Neutral	Neutral
Gln137Arg	Gln	137	Arg	5	c.410A>G	helix	Y	-0.4	0	0	0	0	1	0.62	0.02	-0.0108593	2	-2	143.8	29.6	0	0.671111	1	0.6906	-0.0036	ExAC	Neutral	Disease	Disease	Disease	Neutral
His145Tyr	His	145	Tyr	5	c.433C>T	coil	Y	-0.47	0	0	0	0	0	0.78	-0.02	-0.24922	2	-3	153.2	40.4	0	0.897321	2	0.9697	-0.0556	ExAC	Neutral	Disease	Neutral	Neutral	Disease
#:The reference gene model is ENST00000598742 (NM_001022.3).
*: The meaning of this column was described in Table S7.
