# Supplementary material for: Computational Studies of the Structural Basis of Human RPS19 Mutations Associated With Diamond-Blackfan Anemia
Source: Front Genet. 2021 May 24;12:650897. doi: 10.3389/fgene.2021.650897 (PMC8181406; doi:10.3389/fgene.2021.650897)
Supplement: Supplementary file 6 [file Table_4.XLSX]

## Sheet: Table S4 Hydrogen bonds 
Supplementary Table 4. The Hydrogen Bonds between RPS19 and 18S rRNA*
Number	RPS19	Dist. [Å]	18S rRNA
1	T:GLN 12[ NE2]	3.22	2:C1593[ O2']
2	T:ARG 16[ NH2]	3.78	2:A1594[ O2']
3	T:LYS 38[ NZ ]	2.37	2:C1628[ OP1]
4	T:LYS 43[ NZ ]	2.62	2:G1540[ OP2]
5	T:GLU 44[ N ]	2.89	2:U1539[ OP1]
6	T:LEU 45[ N ]	2.75	2:U1539[ OP1]
7	T:TYR 48[ N ]	3.87	2:U1539[ O2']
8	T:TYR 48[ OH ]	3.46	2:U1596[ O2 ]
9	T:TYR 48[ OH ]	2.28	2:C1538[ O2 ]
10	T:SER 59[ OG ]	3.73	2:G1541[ O3']
11	T:ARG 62[ NH2]	2.47	2:C1542[ OP1]
12	T:ARG 62[ NH2]	2.54	2:U1543[ OP2]
13	T:HIS 63[ NE2]	3.64	2:C1542[ OP2]
14	T:HIS 63[ NE2]	3.45	2:C1542[ OP1]
15	T:ARG 67[ NH2]	2.41	2:U1585[ OP1]
16	T:GLY 68[ N ]	2.68	2:G1429[ OP1]
17	T:VAL 72[ N ]	3.51	2:C1562[ OP1]
18	T:VAL 72[ N ]	2.87	2:G1563[ OP2]
19	T:SER 74[ N ]	2.56	2:C1562[ OP1]
20	T:LYS 77[ NZ ]	3.44	2:G1587[ OP1]
21	T:ARG 82[ NE ]	2.50	2:G1654[ OP1]
22	T:ARG 82[ NH2]	3.61	2:A1531[ OP1]
23	T:GLN 83[ NE2]	3.84	2:C1627[ OP1]
24	T:ARG 84[ NH1]	2.38	2:G1605[ OP1]
25	T:ARG 84[ NH2]	2.46	2:A1537[ O3']
26	T:ARG 84[ NH2]	3.44	2:A1537[ O2']
27	T:PHE 92[ N ]	2.49	2:C1655[ OP1]
28	T:PHE 92[ N ]	3.65	2:G1654[ O3']
29	T:ARG 94[ NH1]	3.59	2:A1561[ OP1]
30	T:LYS 97[ N ]	3.25	2:C1568[ OP1]
31	T:SER 98[ N ]	2.59	2:C1568[ OP1]
32	T:SER 98[ N ]	3.81	2:G1566[ O6 ]
33	T:VAL 99[ N ]	2.98	2:C1568[ OP1]
34	T:ARG 101[ NH1]	3.72	2:C1564[ O5']
35	T:ARG 101[ NH1]	2.28	2:C1565[ OP2]
36	T:ARG 101[ NH2]	3.89	2:C1565[ O5']
37	T:ARG 102[ NE ]	3.40	2:C1565[ OP2]
38	T:ARG 102[ NH2]	3.62	2:C1565[ O3']
39	T:GLN 105[ NE2]	3.88	2:C1565[ OP2]
40	T:LYS 115[ NZ ]	2.77	2:G1563[ O3']
41	T:LYS 115[ NZ ]	3.21	2:G1563[ O2']
42	T:ARG 121[ NE ]	3.53	2:G1563[ OP1]
43	T:ARG 121[ NH2]	2.60	2:C1564[ OP1]
44	T:LYS 122[ NZ ]	3.81	2:C1430[ OP1]
45	T:ARG 129[ NH2]	2.61	2:C1415[ OP1]
46	T:GLN 12[ OE1]	3.28	2:G1541[ N2 ]
* Calculated by using PDBePISA
