# Supplementary material for: Computational Studies of the Structural Basis of Human RPS19 Mutations Associated With Diamond-Blackfan Anemia
Source: Front Genet. 2021 May 24;12:650897. doi: 10.3389/fgene.2021.650897 (PMC8181406; doi:10.3389/fgene.2021.650897)
Supplement: Supplementary file 7 [file Table_5.XLSX]

## Sheet: Table S5 Mechanisms
Supplementary Table 5. The Mechanisms of 51 DBA-associated RPS19 Mutations
Mutation	Decrease Structure Stability			Disrupt Interactions with rRNA			Notes
	Destroy hydrophobic core (Decrease hydrophobicity)	Destroy hydrophobic core (Increase volume)	Break helix (Mutated to Proline)	Steric hindrance at binding interface	Destory hydrogen bond formation	Change surface electrostatic property
Val9Glu	√					√
Val15Phe	√	√
Ala17Pro							ΔΔG = 0.62 kcal/mol, not so large. Possibly belonging to "Break helix (Mutated to Proline)"
Leu18Pro	√		√
Leu18Arg	√	√
Ala20Pro							ΔΔG = 0.07 kcal/mol, not so large. Possibly belonging to "Break helix (Mutated to Proline)"
Phe21Ser	√
Lys23Arg							Uncertain, may form intra-molecular hydrogen bond with Leu28, limit the IDR conformation, and then affect interaction
Leu28Arg	√	√
Lys38Asn					√	√
Pro47Thr	√	√			√
Pro47Ser	√				√
Pro47Leu					√
Trp52Arg	√
Trp52Cys	√
Thr55Met				√
Arg56Pro			√			√
Arg56Gln						√
Ala57Thr							ΔΔG = 0.63 kcal/mol, not so large. Possibly "decrease hydrophobicity" and "increase volume", and then destroy hydrophobic core
Ala57Pro							ΔΔG = 0.10 kcal/mol, not so large. Possibly belonging to "Break helix (Mutated to Proline)"
Ala58Pro							ΔΔG = -0.08 kcal/mol, nearly zero. Possibly belonging to "Break helix (Mutated to Proline)"
Ser59Phe				√	√
Thr60Pro	√		√
Ala61Glu	√	√
Arg62Trp				√	√	√
Arg62Gln					√	√
His63Pro			√		√
Leu64Arg	√	√
Leu64Pro							ΔΔG = 0.84 kcal/mol, not so large. Possibly belonging to "Break helix (Mutated to Proline)"
Arg67Pro			√		√	√
Ala70Thr	√	√
Gly71Glu						√
Thr76Pro	√		√
Arg94Leu					√	√
Gly95Val		√
Ser96Pro					√
Arg101Cys					√	√
Arg101His		√			√	√
Arg101Pro			√		√	√
Arg102Pro					√	√
Val103Asp	√
Leu107Arg	√	√
Leu107Gln	√
Asp118Gly					√
Gly120Arg	√	√
Gly127Glu	√	√
Gly127Arg	√	√
Leu131Arg	√	√
Leu131Pro	√		√
Ala135Thr	√	√
Val138Leu							Uncertain. ΔΔG by FoldX is nearly -1. May improve the stability substantially.
