# Supplementary material for: Computational Studies of the Structural Basis of Human RPS19 Mutations Associated With Diamond-Blackfan Anemia
Source: Front Genet. 2021 May 24;12:650897. doi: 10.3389/fgene.2021.650897 (PMC8181406; doi:10.3389/fgene.2021.650897)
Supplement: Supplementary file 8 [file Table_6.DOCX]

Supplementary Material

**Supplementary Table 6.** Metrics of Performance Evaluation

| **Metrics** | **Description** | **Definition1** |
| --- | --- | --- |
| TPR | sensitivity or true positive rate |  |
| TNR | specificity or true negative rate |  |
| PPV | precision or positive predictive value |  |
| NPV | negative predictive value |  |
| FPR | false positive rate |  |
| FDR | false discovery rate |  |
| FNR | miss rate or false negative rate |  |
| ACC | accuracy |  |
| F1 | F1 Score |  |
| MCC | Matthews correlation coefficient |  |

1TP: true positive, TN: true negative, FP: false positive, FN: false negative.
