# Supplementary material for: Computational Studies of the Structural Basis of Human RPS19 Mutations Associated With Diamond-Blackfan Anemia
Source: Front Genet. 2021 May 24;12:650897. doi: 10.3389/fgene.2021.650897 (PMC8181406; doi:10.3389/fgene.2021.650897)
Supplement: Supplementary file 10 [file Table_8.XLSX]

## Sheet: Table S8 ALL_Mutations
Supplementary Table 8. The Pathogenecity Scores of All Possible Mutations of RPS19 Predicted by RPS19-SVM*
Position	Residue	His	Arg	Lys	Ile	Phe	Leu	Trp	Val	Ala	Met	Pro	Cys	Asn	Gly	Ser	Gln	Tyr	Thr	Asp	Glu
2	P	0.542074	0.316855	0.395992	0.808697	0.892815	0.896325	0.857351	0.785782	0.78533	0.702236	0.0545754	0.735864	0.277346	0.298029	0.30474	0.557738	0.723979	0.36274	0.5	0.816339
3	G	0.489698	0.193092	0.273123	0.779657	0.798163	0.88989	0.697769	0.766503	0.639013	0.683733	0.365369	0.625561	0.136214	0.0498526	0.162365	0.51426	0.562953	0.302187	0.464182	0.845455
4	V	0.594832	0.572632	0.404448	0.0666494	0.191435	0.0877915	0.256627	0.0515556	0.201414	0.143322	0.75333	0.19653	0.716614	0.778477	0.536963	0.541643	0.294915	0.344111	0.82757	0.737812
5	T	0.268245	0.113308	0.111371	0.490924	0.569133	0.488232	0.5	0.398714	0.289447	0.293705	0.302908	0.403249	0.153947	0.270054	0.106099	0.255274	0.505412	0.0623994	0.537506	0.629326
6	V	0.876906	0.750975	0.604101	0.0740997	0.424476	0.0959317	0.715482	0.059202	0.307066	0.162213	0.806635	0.252634	0.803556	0.884023	0.712807	0.695415	0.434163	0.540803	0.90694	0.838741
7	K	0.0379393	0.00680038	0.00509189	0.450454	0.34474	0.200097	0.32262	0.277792	0.102819	0.0876298	0.103916	0.2978	0.0560163	0.128237	0.0502785	0.0330929	0.238453	0.076389	0.380937	0.228225
8	D	0.243196	0.222423	0.196505	0.793857	0.813477	0.871599	0.822695	0.794066	0.616463	0.646718	0.393554	0.706134	0.102182	0.265228	0.123956	0.193933	0.789356	0.180537	0.0583673	0.257004
9	V	0.970554	0.865706	0.752043	0.158671	0.734784	0.219478	0.793761	0.10776	0.516896	0.411512	0.939784	0.440805	0.909849	0.934199	0.831998	0.829532	0.859146	0.666103	0.964758	0.957743
10	N	0.150483	0.0890847	0.123997	0.749016	0.8134	0.84335	0.82343	0.778855	0.707976	0.573228	0.313419	0.665463	0.033738	0.149184	0.114698	0.255367	0.670823	0.164572	0.288069	0.672986
11	Q	0.146627	0.0951655	0.0721315	0.550331	0.581479	0.451454	0.429983	0.457066	0.258358	0.221661	0.439166	0.52302	0.244318	0.524125	0.181228	0.0569445	0.487449	0.25393	0.430935	0.262172
12	Q	0.025405	0.0212523	0.0149779	0.226498	0.23389	0.148858	0.138306	0.149483	0.081006	0.0611593	0.179827	0.222584	0.0775713	0.245229	0.0535426	0.0129438	0.167396	0.0783618	0.181433	0.0859374
13	E	0.14151	0.374622	0.19076	0.510784	0.366272	0.310599	0.33016	0.317228	0.15764	0.211288	0.764787	0.621865	0.40239	0.736787	0.231406	0.068022	0.618324	0.3473	0.162537	0.0538509
14	F	0.753052	0.777422	0.733783	0.197425	0.0540416	0.171716	0.17909	0.354309	0.566557	0.29282	0.980744	0.506591	0.888983	0.908793	0.717838	0.794512	0.153223	0.771815	0.906455	0.906561
15	V	0.920813	0.801468	0.687112	0.329517	0.664316	0.407028	0.759157	0.251169	0.594713	0.527169	0.946274	0.611145	0.921349	0.94072	0.848572	0.826483	0.746794	0.733733	0.966331	0.954492
16	R	0.107649	0.0152889	0.0288729	0.616803	0.652059	0.596329	0.601676	0.620878	0.39431	0.318636	0.436157	0.60314	0.161835	0.321398	0.210741	0.130143	0.5	0.228854	0.74435	0.63933
17	A	0.363365	0.413732	0.256182	0.323352	0.401351	0.265641	0.364606	0.216633	0.0589861	0.143138	0.798434	0.339727	0.650927	0.678421	0.269471	0.262778	0.64797	0.330388	0.682767	0.513524
18	L	0.764726	0.757524	0.611797	0.147392	0.14631	0.0589923	0.331513	0.159491	0.412781	0.159844	0.943903	0.384157	0.881696	0.938502	0.730697	0.663896	0.443551	0.623903	0.932031	0.879508
19	A	0.531074	0.40834	0.284265	0.447579	0.395517	0.27623	0.579185	0.229762	0.0590033	0.15969	0.805192	0.331775	0.677594	0.662092	0.257961	0.281429	0.660056	0.350266	0.731505	0.515081
20	A	0.318586	0.366935	0.251591	0.359677	0.37658	0.257088	0.420764	0.215892	0.0589846	0.170084	0.755139	0.31289	0.646867	0.645818	0.235465	0.224743	0.636539	0.291791	0.645631	0.426747
21	F	0.637616	0.701611	0.64778	0.15453	0.0538682	0.166843	0.129094	0.249388	0.484789	0.307563	0.905852	0.365391	0.822178	0.863185	0.650716	0.72261	0.141071	0.613988	0.88372	0.857831
22	L	0.687403	0.656395	0.555805	0.127381	0.148137	0.0589846	0.238321	0.136063	0.323412	0.153555	0.930329	0.351463	0.826028	0.924679	0.663076	0.566284	0.467982	0.573963	0.913513	0.851991
23	K	0.276549	0.082656	0.0549571	0.671672	0.685158	0.590687	0.678359	0.575293	0.47248	0.402037	0.671118	0.647802	0.35444	0.621759	0.310969	0.250325	0.644907	0.389374	0.769079	0.646618
24	K	0.231543	0.0799232	0.0549571	0.640036	0.634336	0.574747	0.611398	0.528775	0.438566	0.403956	0.517999	0.604415	0.331617	0.577944	0.287835	0.224538	0.57408	0.355103	0.741711	0.63094
25	S	0.201192	0.116058	0.110892	0.394631	0.432467	0.5	0.474064	0.492373	0.229358	0.260337	0.257189	0.256591	0.106007	0.165373	0.0589846	0.169534	0.376835	0.104767	0.290236	0.413156
26	G	0.638326	0.376665	0.517483	0.873219	0.862164	0.937355	0.799523	0.878189	0.70339	0.800972	0.807245	0.693406	0.219581	0.0538682	0.259833	0.653037	0.693928	0.456384	0.512717	0.866445
27	K	0.248235	0.0789004	0.0549571	0.695287	0.702297	0.622967	0.660979	0.579413	0.465247	0.436915	0.615021	0.64887	0.361887	0.599549	0.295462	0.253427	0.63739	0.365413	0.750385	0.641035
28	L	0.644056	0.656375	0.561061	0.112134	0.125052	0.0589905	0.581658	0.121422	0.353793	0.125468	0.969398	0.385802	0.844744	0.930302	0.702565	0.591622	0.428535	0.613768	0.918921	0.86787
29	K	0.248068	0.083089	0.0549927	0.691511	0.663151	0.611187	0.645504	0.583522	0.45734	0.40189	0.559803	0.668158	0.351068	0.593351	0.291587	0.258238	0.615733	0.354624	0.741355	0.636897
30	V	0.648737	0.485154	0.333096	0.0742331	0.289676	0.103907	0.3666	0.0591891	0.235562	0.13992	0.80985	0.237272	0.684308	0.823263	0.556074	0.476441	0.408605	0.332165	0.771796	0.675213
31	P	0.703397	0.470208	0.439071	0.820706	0.861753	0.887654	0.851234	0.797002	0.804584	0.721546	0.0560618	0.677052	0.32765	0.391452	0.399172	0.644997	0.619388	0.5	0.612059	0.847589
32	E	0.0591227	0.165517	0.0758229	0.307945	0.272473	0.223683	0.232861	0.161743	0.069319	0.104347	0.440895	0.448395	0.190474	0.4867	0.0900819	0.02499	0.429436	0.131235	0.0658594	0.0191307
33	W	0.760196	0.722824	0.652571	0.35292	0.115772	0.27563	0.0825893	0.455176	0.655134	0.381932	0.927247	0.37101	0.873416	0.824986	0.791655	0.750476	0.17193	0.710273	0.932886	0.898241
34	V	0.91119	0.775019	0.682786	0.164988	0.491437	0.222315	0.658118	0.109145	0.5	0.344756	0.924367	0.478017	0.91691	0.935874	0.815513	0.820533	0.643118	0.63226	0.95736	0.925152
35	D	0.456887	0.385424	0.359752	0.790112	0.819301	0.899505	0.857653	0.801738	0.728622	0.733122	0.527936	0.720387	0.243369	0.460589	0.270168	0.390408	0.771703	0.363206	0.147356	0.474068
36	T	0.125408	0.0412381	0.0476546	0.18919	0.289731	0.262704	0.248574	0.145958	0.155707	0.172551	0.282067	0.215877	0.0748987	0.177088	0.0532672	0.121826	0.253444	0.0246277	0.383117	0.429096
37	V	0.580769	0.476252	0.348613	0.112873	0.300298	0.178518	0.5	0.0788082	0.300102	0.167858	0.90061	0.28023	0.734584	0.820269	0.57342	0.602248	0.428769	0.371321	0.873249	0.841664
38	K	0.364631	0.0885075	0.0551947	0.853242	0.824018	0.785561	0.851267	0.779777	0.632398	0.627969	0.698051	0.850103	0.5	0.728303	0.459448	0.428093	0.775313	0.604273	0.905501	0.835578
39	L	0.943816	0.835366	0.757755	0.262085	0.598067	0.144722	0.673542	0.321598	0.667756	0.297183	0.947385	0.646595	0.940189	0.967711	0.870743	0.850235	0.902748	0.81898	0.970333	0.963217
40	A	0.999998	0.816193	0.772604	0.901535	0.974964	0.886724	0.987713	0.757667	0.216602	0.717106	0.939338	0.735493	0.940152	0.877205	0.596107	0.892427	0.98609	0.768876	0.962376	0.951365
41	K	0.0525295	0.0120964	0.00767275	0.466563	0.468147	0.317099	0.438545	0.284327	0.14829	0.156696	0.193976	0.352445	0.100801	0.219899	0.0761656	0.0692999	0.357902	0.109762	0.492612	0.350113
42	H	0.0609339	0.190552	0.137742	0.527634	0.286099	0.492155	0.350168	0.446159	0.219289	0.247216	0.582902	0.438832	0.228545	0.524298	0.214338	0.153992	0.270595	0.293325	0.424037	0.342559
43	K	0.184945	0.0429828	0.0240439	0.639869	0.631421	0.550167	0.639178	0.520167	0.404601	0.374354	0.569626	0.622768	0.286583	0.551983	0.251444	0.18859	0.570327	0.327358	0.770919	0.646347
44	E	0.0503992	0.147076	0.0651362	0.223964	0.197274	0.160099	0.190395	0.123762	0.0629665	0.104299	0.430614	0.424103	0.183202	0.528946	0.10329	0.0249291	0.40515	0.137846	0.0740086	0.0195122
45	L	0.152783	0.136562	0.103439	0.0257168	0.0410399	0.0132069	0.0849251	0.0300376	0.0820701	0.0270429	0.652342	0.0887033	0.417236	0.681571	0.220473	0.19983	0.164575	0.149455	0.672776	0.566432
46	A	0.245846	0.318843	0.221263	0.352596	0.389596	0.284043	0.489325	0.205237	0.0646612	0.206569	0.720719	0.344244	0.648237	0.654876	0.245422	0.274374	0.652925	0.309528	0.716559	0.530463
47	P	0.65695	0.39167	0.400224	0.730399	0.857044	0.874491	0.888091	0.763708	0.788334	0.719108	0.0674822	0.676733	0.400934	0.4328	0.390941	0.603283	0.62736	0.448879	0.656468	0.888545
48	Y	0.0959578	0.141536	0.168563	0.086947	0.0402345	0.215989	0.0508923	0.149309	0.389553	0.178835	0.435384	0.11001	0.281362	0.342635	0.243458	0.282456	0.013215	0.25051	0.666159	0.708189
49	D	0.250685	0.238983	0.233427	0.458857	0.5	0.650607	0.611758	0.494666	0.429647	0.385253	0.229857	0.406364	0.109785	0.220245	0.103821	0.186344	0.466292	0.115382	0.0528888	0.163286
50	E	0.384076	0.593573	0.385213	0.873931	0.865359	0.81213	0.858788	0.753708	0.531012	0.70945	0.892076	0.934657	0.721285	0.920392	0.604788	0.251926	0.928591	0.686848	0.550093	0.193987
51	N	0.217019	0.119772	0.173526	0.664302	0.685409	0.755736	0.803143	0.711882	0.658065	0.507227	0.375637	0.595272	0.0538682	0.169509	0.139185	0.253599	0.483956	0.152973	0.270482	0.581901
52	W	0.897657	0.92211	0.881162	0.749231	0.411169	0.667235	0.171538	0.833424	0.868862	0.70943	0.970625	0.699726	0.947703	0.93734	0.917019	0.919279	0.544009	0.905482	0.982532	0.977916
53	F	0.707965	0.798066	0.758284	0.165237	0.054087	0.168678	0.118532	0.30446	0.618778	0.298811	0.903033	0.389769	0.86627	0.908402	0.776617	0.816596	0.138015	0.765416	0.916477	0.91634
54	Y	0.454254	0.571366	0.614737	0.236822	0.135043	0.484039	0.182401	0.402088	0.735406	0.425462	0.79803	0.334464	0.687374	0.755197	0.652556	0.717811	0.0555721	0.648261	0.900588	0.903095
55	T	0.39088	0.13217	0.137664	0.316915	0.5	0.457605	0.5	0.28609	0.33814	0.322895	0.514465	0.3178	0.180838	0.358251	0.137615	0.307113	0.452383	0.0739958	0.555781	0.656451
56	R	0.703993	0.159894	0.252616	0.911798	0.94114	0.897637	0.954072	0.917396	0.863121	0.798243	0.943155	0.924909	0.690131	0.848307	0.75544	0.671137	0.91651	0.746443	0.968615	0.951015
57	A	0.942512	0.370165	0.264272	0.267071	0.589391	0.214969	0.822454	0.156772	0.0589846	0.154397	0.74676	0.301025	0.603959	0.653423	0.254047	0.247702	0.876181	0.327554	0.706335	0.51074
58	A	0.999998	0.729334	0.656766	0.520789	0.995752	0.686765	0.999996	0.194827	0.0590045	0.366869	0.745579	0.330288	0.790529	0.660431	0.254352	0.418166	0.999982	0.297254	0.806113	0.744648
59	S	0.71882	0.44227	0.395545	0.874391	0.893834	0.905623	0.933117	0.885026	0.732241	0.788432	0.800125	0.826779	0.515084	0.652995	0.312064	0.679572	0.880721	0.508483	0.852079	0.901641
60	T	0.608144	0.233751	0.20004	0.34792	0.637813	0.5	0.706137	0.266694	0.356417	0.271656	0.540938	0.405811	0.147154	0.355984	0.112053	0.286377	0.637459	0.0553366	0.365966	0.492981
61	A	0.421683	0.443234	0.27794	0.293514	0.492456	0.234341	0.470401	0.152159	0.0590721	0.156667	0.76897	0.332209	0.647225	0.659227	0.291227	0.334199	0.840789	0.353174	0.720584	0.559175
62	R	0.84965	0.195219	0.321121	0.965697	0.964316	0.956341	0.965581	0.963871	0.939506	0.906761	0.949395	0.96665	0.825265	0.936799	0.874074	0.787465	0.943337	0.861038	0.987146	0.976982
63	H	0.0837893	0.289714	0.269949	0.785803	0.644559	0.769972	0.724345	0.764847	0.645155	0.587761	0.851874	0.84459	0.408888	0.828512	0.47815	0.279394	0.56154	0.568472	0.745271	0.59683
64	L	0.686294	0.785626	0.612297	0.118985	0.154791	0.059091	0.274621	0.128208	0.328138	0.122597	0.903974	0.394596	0.8677	0.931122	0.698318	0.676592	0.512107	0.60158	0.927436	0.891154
65	Y	0.584805	0.645593	0.642718	0.395313	0.175706	0.590122	0.213378	0.528134	0.779693	0.533363	0.949375	0.363238	0.763768	0.803932	0.711165	0.762837	0.0669022	0.70352	0.931837	0.932125
66	L	0.310427	0.34259	0.240183	0.0532332	0.0789095	0.0247652	0.187139	0.0601606	0.135432	0.0508041	0.827081	0.192858	0.604496	0.780772	0.359193	0.347688	0.298147	0.300437	0.802807	0.735592
67	R	0.0244011	0.00375201	0.00566162	0.371266	0.382123	0.284864	0.410802	0.307939	0.143985	0.134302	0.186425	0.396903	0.0475339	0.118919	0.0645889	0.0357063	0.309692	0.0690233	0.472813	0.328281
68	G	0.744493	0.453171	0.566163	0.942466	0.927228	0.962901	0.906777	0.923996	0.833859	0.891458	0.56414	0.849901	0.336788	0.0951889	0.38703	0.80417	0.852558	0.627873	0.765483	0.94888
69	G	0.649706	0.386503	0.514315	0.888387	0.883107	0.941471	0.893795	0.890234	0.767207	0.818761	0.572378	0.778223	0.257388	0.0550095	0.273476	0.707372	0.730422	0.5	0.550636	0.888756
70	A	0.653024	0.625469	0.5	0.630099	0.706727	0.53119	0.820798	0.447504	0.164173	0.410715	0.913558	0.655774	0.862482	0.860123	0.597205	0.646564	0.855279	0.685956	0.915234	0.826608
71	G	0.879965	0.647116	0.711838	0.938439	0.943408	0.972356	0.947445	0.936716	0.892429	0.927176	0.742686	0.889923	0.517137	0.202011	0.565789	0.891404	0.899504	0.734236	0.84666	0.968729
72	V	0.822276	0.791244	0.650133	0.168992	0.4883	0.257474	0.778857	0.115933	0.433042	0.250331	0.909658	0.553972	0.893989	0.92293	0.798247	0.806181	0.676863	0.641345	0.950282	0.91549
73	G	0.566606	0.308916	0.410815	0.78657	0.824824	0.907374	0.798946	0.798419	0.686731	0.742576	0.397425	0.695821	0.19476	0.0653391	0.225878	0.66198	0.683767	0.37305	0.549499	0.8845
74	S	0.274301	0.170594	0.137791	0.704853	0.716174	0.737692	0.812186	0.692329	0.372969	0.462052	0.459973	0.588935	0.163808	0.264608	0.0791666	0.30668	0.673212	0.166749	0.473738	0.625278
75	M	0.58061	0.567058	0.436915	0.249068	0.397921	0.163266	0.60554	0.19878	0.29073	0.0635665	0.847353	0.476386	0.69431	0.830279	0.514177	0.47786	0.649723	0.5	0.845838	0.76699
76	T	0.526113	0.163388	0.160721	0.5	0.900508	0.587914	0.909936	0.384428	0.393814	0.366785	0.45055	0.579888	0.180037	0.338676	0.107867	0.262016	0.955583	0.0550465	0.461346	0.52087
77	K	0.0978902	0.0201119	0.0113952	0.674715	0.720609	0.531185	0.752594	0.5	0.333284	0.320963	0.290048	0.690885	0.171601	0.413611	0.157256	0.0989237	0.617164	0.208362	0.680116	0.522945
78	I	0.355796	0.328396	0.285472	0.0268835	0.087006	0.0488647	0.248515	0.0399356	0.172759	0.0699805	0.652223	0.126137	0.440459	0.622318	0.345638	0.468811	0.144106	0.249535	0.711629	0.721283
79	Y	0.540717	0.654597	0.697879	0.349586	0.15754	0.575163	0.192903	0.528315	0.756517	0.537709	0.814741	0.306487	0.715052	0.739772	0.70255	0.740456	0.0617186	0.774531	0.903979	0.913313
80	G	0.852799	0.480274	0.575474	0.869475	0.926462	0.946435	0.900813	0.879655	0.802764	0.805786	0.763093	0.800962	0.350125	0.100809	0.359739	0.776234	0.845116	0.517491	0.720533	0.933723
81	G	0.844054	0.58754	0.630561	0.941917	0.939257	0.962546	0.931034	0.939364	0.860999	0.890666	0.828284	0.880122	0.415376	0.11033	0.421425	0.832916	0.890606	0.65532	0.742531	0.947435
82	R	0.0904264	0.0115511	0.0205283	0.749464	0.802649	0.690749	0.804629	0.705712	0.479738	0.405667	0.38053	0.752118	0.164157	0.390883	0.257693	0.121311	0.70873	0.244665	0.79634	0.692253
83	Q	0.273697	0.203813	0.143019	0.845023	0.900194	0.754427	0.864893	0.764147	0.547249	0.453239	0.649361	0.853541	0.479096	0.782196	0.393783	0.0871358	0.846197	0.5	0.620926	0.419394
84	R	0.140383	0.0163876	0.0292737	0.791008	0.853825	0.751913	0.86891	0.776901	0.572201	0.486147	0.452746	0.817315	0.228291	0.483094	0.340557	0.18692	0.780443	0.321003	0.827629	0.757938
85	N	0.175454	0.109844	0.136579	0.654779	0.760268	0.781785	0.823707	0.704205	0.637002	0.460337	0.258531	0.647498	0.0473608	0.13488	0.0968764	0.25443	0.634919	0.138038	0.215106	0.55036
86	G	0.579382	0.287073	0.407583	0.869697	0.859359	0.923609	0.845538	0.862918	0.670145	0.751	0.541872	0.756805	0.187712	0.0348639	0.179132	0.64724	0.761073	0.423927	0.557555	0.872838
87	V	0.0479786	0.0428574	0.0265652	0.00554588	0.015472	0.00707658	0.0465601	0.00448736	0.0118052	0.00991744	0.106407	0.0171361	0.0779185	0.113514	0.0418252	0.0541797	0.0251486	0.0224649	0.181216	0.121908
88	M	0.0562481	0.0413871	0.0319728	0.0419458	0.0665068	0.0254539	0.112007	0.0312	0.031678	0.00854455	0.243133	0.0790441	0.112086	0.237111	0.0556853	0.0446355	0.108932	0.0700274	0.285105	0.189526
89	P	0.23116	0.0838998	0.0945491	0.54284	0.692256	0.697295	0.720968	0.5	0.486866	0.388877	0.0182295	0.470171	0.124012	0.136289	0.106514	0.220679	0.461922	0.114987	0.281646	0.633316
90	S	0.389993	0.200822	0.160465	0.674323	0.748315	0.723247	0.798049	0.663801	0.434225	0.438284	0.3893	0.597687	0.183231	0.299075	0.103693	0.289861	0.716531	0.183796	0.541255	0.651514
91	H	0.0145276	0.0294573	0.0390782	0.457367	0.37496	0.353677	0.430419	0.376587	0.193718	0.150916	0.308531	0.369785	0.0740803	0.292078	0.0898454	0.0546627	0.220581	0.139293	0.320342	0.292068
92	F	0.443324	0.577408	0.515126	0.138652	0.0285196	0.157678	0.0880222	0.222108	0.420689	0.241053	0.88561	0.344459	0.750161	0.815635	0.593164	0.686352	0.106541	0.577519	0.878854	0.845723
93	S	0.29173	0.13825	0.11533	0.505165	0.628948	0.60891	0.720386	0.488199	0.294064	0.283131	0.328628	0.5	0.134343	0.199146	0.0590859	0.184934	0.571042	0.0983676	0.300929	0.441059
94	R	0.17834	0.0318801	0.0525184	0.844339	0.87081	0.798884	0.893662	0.814254	0.644642	0.507543	0.477743	0.861704	0.265484	0.506728	0.351958	0.23825	0.806187	0.390343	0.838161	0.772357
95	G	0.99216	0.973399	0.953272	0.984357	0.985224	0.989726	0.99999	0.970111	0.8483	0.943898	0.955227	0.912331	0.560044	0.111769	0.478261	0.966199	0.98296	0.865961	0.805838	0.961737
96	S	0.708453	0.443582	0.407419	0.933576	0.916568	0.906588	0.965154	0.880144	0.712073	0.747267	0.680745	0.838409	0.434012	0.60781	0.294451	0.64067	0.879446	0.469893	0.81509	0.870424
97	K	0.065072	0.014756	0.00853865	0.635051	0.65651	0.483389	0.644346	0.467809	0.238367	0.205113	0.221344	0.584104	0.10672	0.293773	0.0964969	0.0623968	0.514946	0.143745	0.529988	0.389837
98	S	0.465889	0.263262	0.221171	0.804655	0.853781	0.858825	0.891245	0.804164	0.566239	0.621475	0.678346	0.75499	0.30577	0.436945	0.149578	0.494281	0.825532	0.274904	0.70443	0.823581
99	V	0.9	0.825092	0.707698	0.286515	0.615104	0.372639	0.831859	0.213701	0.608802	0.438624	0.939781	0.682228	0.927507	0.952609	0.859592	0.861009	0.739235	0.724993	0.97328	0.936414
100	A	0.517191	0.559394	0.571589	0.313198	0.847666	0.231885	0.993586	0.184311	0.0593805	0.156171	0.75455	0.368302	0.647199	0.681045	0.297795	0.353582	0.953436	0.345831	0.661194	0.522458
101	R	0.780282	0.109561	0.219292	0.978249	0.976762	0.958842	0.979754	0.974348	0.915843	0.877747	0.964279	0.973287	0.74198	0.889577	0.814202	0.662459	0.962563	0.859615	0.980148	0.967044
102	R	0.247661	0.0343316	0.0663204	0.896591	0.894018	0.836916	0.901857	0.882799	0.711599	0.593176	0.656756	0.893072	0.366582	0.635522	0.481865	0.2984	0.839727	0.52114	0.905409	0.860158
103	V	0.74081	0.806624	0.576147	0.0751294	0.293713	0.0965689	0.706433	0.0596939	0.235932	0.169167	0.764906	0.285937	0.735071	0.83261	0.599099	0.570339	0.473486	0.386653	0.84681	0.756312
104	L	0.768117	0.750378	0.601395	0.14388	0.20293	0.0592741	0.768556	0.135737	0.346311	0.150978	0.91607	0.418916	0.855858	0.930794	0.699892	0.626966	0.542587	0.576061	0.905366	0.839287
105	Q	0.0666417	0.0852879	0.0605415	0.617752	0.625068	0.440387	0.620165	0.488257	0.251133	0.137875	0.570636	0.644094	0.204291	0.533488	0.138862	0.0336625	0.53629	0.222922	0.367208	0.223287
106	A	0.375566	0.39653	0.275797	0.313988	0.394827	0.214875	0.650362	0.18057	0.0596748	0.157425	0.782888	0.360307	0.627443	0.662595	0.276973	0.319987	0.650636	0.310969	0.643802	0.448295
107	L	0.702375	0.686613	0.603364	0.134939	0.173509	0.0590981	0.447942	0.146121	0.373627	0.169674	0.92946	0.384148	0.847697	0.938722	0.731602	0.615392	0.613429	0.590214	0.924577	0.853307
108	E	0.203059	0.45222	0.262294	0.64967	0.652135	0.534119	0.691755	0.446179	0.186036	0.244882	0.804101	0.782248	0.46327	0.776344	0.296646	0.0934686	0.745812	0.341929	0.201666	0.0552009
109	G	0.544148	0.231408	0.352818	0.814033	0.827466	0.903726	0.792763	0.807881	0.664577	0.678031	0.366237	0.641468	0.126321	0.0540849	0.154221	0.537432	0.644995	0.303767	0.401104	0.828686
110	L	0.709148	0.621515	0.548448	0.125157	0.168562	0.0588497	0.351032	0.146857	0.328607	0.15543	0.933611	0.332355	0.808612	0.916549	0.65712	0.57994	0.487725	0.590118	0.898279	0.838483
111	K	0.270623	0.0798704	0.0549571	0.871952	0.800219	0.737112	0.868242	0.731373	0.5	0.427068	0.750406	0.797329	0.334959	0.58339	0.310347	0.267853	0.732245	0.365279	0.750039	0.629109
112	M	0.418442	0.268029	0.198659	0.252967	0.350793	0.194711	0.421911	0.199818	0.237036	0.0549571	0.947179	0.533279	0.544172	0.756112	0.34648	0.213945	0.472315	0.281102	0.788666	0.617326
113	V	0.924991	0.901788	0.697008	0.0833633	0.584889	0.158103	0.952382	0.0589846	0.307665	0.220671	0.873207	0.322865	0.801559	0.895106	0.733123	0.782032	0.777666	0.459362	0.900881	0.865675
114	E	0.137645	0.356584	0.193657	0.618047	0.56768	0.5237	0.622149	0.447411	0.201516	0.235034	0.738184	0.773696	0.384355	0.738405	0.235348	0.0740262	0.729344	0.31808	0.16442	0.0549571
115	K	0.32269	0.0660332	0.0367153	0.912201	0.900932	0.828883	0.892907	0.832108	0.637793	0.551426	0.709265	0.887748	0.392105	0.685553	0.357828	0.263353	0.821606	0.5	0.835823	0.727864
116	D	0.253299	0.289056	0.257264	0.690355	0.675171	0.794035	0.821853	0.661836	0.4888	0.471142	0.472796	0.646876	0.0906836	0.21165	0.0925621	0.1885	0.62819	0.15871	0.0538682	0.164679
117	Q	0.123602	0.122119	0.0850149	0.675287	0.687036	0.540543	0.59783	0.519864	0.265772	0.188826	0.608294	0.674177	0.240548	0.547276	0.165711	0.0549571	0.612919	0.228657	0.344315	0.207288
118	D	0.201833	0.169503	0.162004	0.484003	0.5268	0.661211	0.625248	0.470976	0.389461	0.299262	0.207181	0.469106	0.0639536	0.144798	0.066787	0.106286	0.455708	0.101908	0.0398718	0.131395
119	G	0.647857	0.315948	0.42152	0.881993	0.865193	0.932846	0.832388	0.870371	0.712647	0.754721	0.746969	0.773093	0.219636	0.0529344	0.248631	0.648181	0.737191	0.461073	0.584961	0.898662
120	G	0.969786	0.646627	0.762558	0.984892	0.969439	0.984188	0.966957	0.975895	0.84605	0.916518	0.635032	0.939986	0.506778	0.0903342	0.465506	0.87731	0.914165	0.847726	0.807404	0.960196
121	R	0.929719	0.3352	0.541161	0.991361	0.991362	0.986483	0.992941	0.989998	0.974577	0.951493	0.984702	0.992675	0.911147	0.970352	0.936999	0.885275	0.9857	0.949773	0.994348	0.989973
122	K	0.327428	0.0588267	0.0305756	0.811632	0.800316	0.732484	0.837636	0.671064	0.464644	0.39935	0.646826	0.829151	0.343613	0.591714	0.27461	0.222571	0.732591	0.363994	0.794941	0.681449
123	L	0.981665	0.757405	0.558414	0.135277	0.14404	0.0595953	0.871854	0.132261	0.400407	0.158298	0.910811	0.44575	0.847083	0.945294	0.767678	0.653461	0.699972	0.619022	0.929296	0.883284
124	T	0.33685	0.134423	0.160403	0.433355	0.52772	0.5	0.653347	0.319106	0.262155	0.220241	0.475093	0.458453	0.1561	0.291951	0.106312	0.237447	0.462246	0.0549571	0.438182	0.468993
125	P	0.404931	0.212923	0.220805	0.710121	0.822378	0.825739	0.830731	0.685232	0.650128	0.548718	0.0236459	0.690842	0.239566	0.26255	0.190325	0.36158	0.653505	0.259506	0.473049	0.741905
126	Q	0.10664	0.129298	0.0888692	0.676071	0.675184	0.571692	0.638502	0.5	0.284402	0.178336	0.520447	0.695702	0.259575	0.56393	0.175493	0.0549571	0.576072	0.26297	0.380771	0.211834
127	G	0.999997	0.969174	0.983859	0.999991	0.999995	0.996564	0.999996	0.995416	0.757144	0.971307	0.858941	0.939021	0.792749	0.0538682	0.617985	0.95147	0.999997	0.969813	0.944275	0.985489
128	Q	0.0893415	0.0566792	0.0515195	0.584038	0.649683	0.458544	0.576695	0.464671	0.235866	0.150829	0.739979	0.61523	0.197437	0.488383	0.132775	0.0389245	0.562915	0.22506	0.342152	0.180273
129	R	0.0926256	0.0113257	0.0210327	0.713635	0.681668	0.627143	0.664632	0.649638	0.366095	0.283879	0.51192	0.730455	0.122051	0.276147	0.145113	0.103296	0.591547	0.18765	0.690983	0.578211
130	D	0.222455	0.214814	0.218872	0.561478	0.5	0.706224	0.581506	0.575119	0.47811	0.354494	0.288009	0.68223	0.0901395	0.220503	0.0938904	0.13899	0.517466	0.148093	0.0538682	0.159158
131	L	0.876336	0.816112	0.687135	0.137958	0.147797	0.0592611	0.257126	0.143575	0.433588	0.204602	0.928891	0.446923	0.888722	0.94798	0.780869	0.689608	0.516302	0.673755	0.94041	0.890186
132	D	0.193845	0.171383	0.160379	0.55011	0.571686	0.647457	0.655437	0.531363	0.428473	0.364653	0.31444	0.58501	0.0814717	0.196558	0.0915396	0.130031	0.561123	0.150106	0.0733656	0.199692
133	R	0.220999	0.0417853	0.0729592	0.812813	0.809793	0.755421	0.798013	0.779369	0.590948	0.469974	0.626282	0.877323	0.261258	0.491408	0.346125	0.230522	0.7566	0.408644	0.792782	0.723486
134	I	0.811098	0.795485	0.666814	0.0589861	0.242288	0.143214	0.527683	0.0937205	0.423275	0.227818	0.883929	0.305652	0.73945	0.84574	0.628193	0.722939	0.280968	0.421803	0.885254	0.888229
135	A	0.775473	0.90285	0.697443	0.515156	0.995802	0.557719	0.999999	0.205668	0.0592667	0.485661	0.857061	0.558096	0.724759	0.683214	0.308214	0.661498	0.997005	0.315433	0.784866	0.821068
136	G	0.620715	0.272053	0.372611	0.784384	0.797209	0.896174	0.771715	0.761484	0.639276	0.646635	0.44772	0.695566	0.148212	0.0538728	0.169211	0.563852	0.598579	0.293857	0.417294	0.822815
137	Q	0.108339	0.121149	0.0920942	0.645877	0.702223	0.535206	0.656273	0.515886	0.288957	0.186704	0.569355	0.729863	0.265991	0.583943	0.175824	0.0549583	0.611045	0.291546	0.399367	0.236867
138	V	0.647447	0.573881	0.347009	0.0864448	0.209708	0.105291	0.456474	0.0589496	0.202248	0.134304	0.795848	0.358816	0.676945	0.762831	0.488606	0.487491	0.399943	0.269494	0.767023	0.655017
139	A	0.49295	0.379073	0.244303	0.339895	0.378547	0.255365	0.585575	0.20358	0.0591492	0.164191	0.842323	0.5	0.620343	0.647729	0.26214	0.290926	0.611698	0.286901	0.631346	0.416504
140	A	0.330623	0.374998	0.24391	0.359902	0.379747	0.278978	0.547274	0.198102	0.0589846	0.16913	0.82844	0.485943	0.613496	0.637918	0.256744	0.258049	0.64008	0.255939	0.601726	0.367791
141	A	0.318506	0.387471	0.254674	0.368061	0.381891	0.295441	0.5	0.216629	0.0589861	0.176345	0.79104	0.461347	0.617859	0.64452	0.270051	0.247982	0.656257	0.273674	0.628873	0.417008
142	N	0.202066	0.105549	0.140151	0.592492	0.663231	0.752392	0.73208	0.638333	0.595289	0.425894	0.35234	0.633099	0.0539886	0.135139	0.0968391	0.23777	0.455671	0.15815	0.236734	0.54898
143	K	0.263394	0.0810293	0.0549623	0.791839	0.766178	0.717117	0.764894	0.664684	0.508191	0.45878	0.630439	0.824201	0.330304	0.594159	0.291304	0.227948	0.721843	0.391674	0.723948	0.624435
144	K	0.321359	0.0839757	0.0549571	0.769339	0.732943	0.690896	0.740966	0.634041	0.546848	0.48988	0.673691	0.825058	0.331387	0.592993	0.286629	0.268462	0.690123	0.358097	0.784403	0.632528
145	H	0.0602818	0.148299	0.146741	0.588811	0.391347	0.560048	0.427448	0.564666	0.389676	0.361268	0.607734	0.644649	0.257194	0.618079	0.281332	0.181224	0.333986	0.371206	0.586074	0.479176
* The scores less than 0.5 are shaded with blue, and the smaller the score, the higher the color depth
* The scores greater than 0.5 are shaded with red, and the larger the score, the higher the color depth
	DBA Disease Mutations identified previously
	Neutral Mutations identified from ExAC
Bold Score	Mutations adopted in trainng RPS19-SVM
