# Supplementary material for: Computational Studies of the Structural Basis of Human RPS19 Mutations Associated With Diamond-Blackfan Anemia
Source: Front Genet. 2021 May 24;12:650897. doi: 10.3389/fgene.2021.650897 (PMC8181406; doi:10.3389/fgene.2021.650897)
Supplement: Supplementary file 11 [file Table_9.xlsx]

## Sheet: Table S9
Supplementary Table 9. Additional Neutral RPS19 Variants For Independent Testing
Mutation#	WT	Position	MT	Exon	DNA Change	2nd Structure	Flag for SVM training	Consurf_Score*	BSA*	rBSA*	HB_Num*	WT_Charge*	Delta_Charge*	WT_Hydrophobicity*	Delta_Hydrophobicity*	DDG*	WT_Helix*	Delta_Helix*	WT_Volume*	Delta_Volume*	Intra_HB_Num*	rSASA*	Blosum62*	WT_Disorder*	Delta_Disorder*	Source	RPS19-SVM Cross-validation	Pmut Prediction	Mutpred2 Prediction	PolyPhen2 Prediction	SIFT Prediction
Pro2Ser	Pro	2	Ser	2	c.4C>T	coil	N	1.21	0.58	0.00320212	0	0	1	0.64	0	0.11223	-2	2	112.7	60.7	0	1.11321	-2	0.8424	0.0306	gnomAD	Neutral	Disease	Disease	Neutral	Neutral
Gly3Glu	Gly	3	Glu	2	c.8G>A	coil	N	-0.25	34.65	0.592409	0	0	-1	0.72	0.1	-0.101382	-2	5	60.1	78.3	0	0.528846	-2	0.8036	0.0038	gnomAD	Disease	Disease	Disease	Neutral	Disease
Val9Met	Val	9	Met	2	c.25G>A	coil	N	-1.111	12.37	0.506137	0	0	0	0.86	0.01	1.60347	2	0	140	22.9	2	0.149425	1	0.2963	0.0572	gnomAD	Neutral	Neutral	Disease	Disease	Disease
Asp35Asn	Asp	35	Asn	3	c.103G>A	coil	N	-0.595	93.36	0.674372	5	-1	1	0.62	0.01	-0.0396193	0	1	111.1	3	1	0.746114	1	0.1635	0.0063	gnomAD	Neutral	Disease	Disease	Neutral	Disease
Lys43Arg	Lys	43	Arg	3	c.128A>G	coil	N	-0.571	59.95	0.614179	1	1	0	0.52	0.12	0.145488	1	1	168.6	4.8	0	0.449153	2	0.0789	0.0018	gnomAD	Neutral	Disease	Disease	Neutral	Neutral
Tyr48Cys	Tyr	48	Cys	3	c.143A>G	coil	N	0.403	133.3	0.695975	3	0	0	0.76	0.15	0.26401	-1	1	193.6	85.1	0	0.775665	-2	0.1205	0.0117	gnomAD	Neutral	Neutral	Neutral	Neutral	Neutral
Asp49Asn	Asp	49	Asn	3	c.145G>A	coil	N	-0.148	1.2	0.0172811	0	-1	1	0.62	0.01	1.67864	0	1	111.1	3	0	0.409326	1	0.1205	0.0061	gnomAD	Neutral	Neutral	Disease	Neutral	Neutral
Asp49His	Asp	49	His	3	c.145G>C	coil	N	-0.148	1.2	0.0172811	0	-1	1.5	0.62	0.16	0.864161	0	2	111.1	42.1	0	0.409326	-1	0.1205	0.0061	gnomAD	Neutral	Disease	Disease	Disease	Disease
Asn51Ser	Asn	51	Ser	3	c.152A>G	helix	N	-1.181	0	0	0	0	0	0.63	0.03	1.72199	-1	1	114.1	25.1	0	0.246154	1	0.1805	0.0107	gnomAD	Neutral	Disease	Disease	Neutral	Disease
Ala61Val	Ala	61	Val	4	c.182C>T	helix	N	0.084	0	0	0	0	0	0.74	0.12	-0.886368	3	1	88.6	51.4	1	0.0232558	0	0.138	0.023	gnomAD	Neutral	Neutral	Disease	Neutral	Neutral
Arg67Trp	Arg	67	Trp	4	c.199C>T	helix	N	-0.476	143.44	0.770851	1	1	-1	0.64	0.21	0.789602	0	2	173.4	54.4	1	0.708029	-3	0.3053	0.1355	gnomAD	Neutral	Neutral	Disease	Disease	Disease
Met75Leu	Met	75	Leu	4	c.223A>C	helix	N	-0.118	1.67	0.129457	0	0	0	0.85	0	0.0195618	2	1	162.9	3.8	0	0.0580357	2	0.3535	0.0389	gnomAD	Neutral	Disease	Disease	Neutral	Neutral
Thr76Ile	Thr	76	Ile	4	c.227C>T	helix	N	0.375	0	0	0	0	0	0.7	0.18	0.246148	0	1	116.1	50.6	0	0.0406977	-1	0.4333	0.1022	gnomAD	Neutral	Neutral	Disease	Neutral	Neutral
Lys77Arg	Lys	77	Arg	4	c.230A>G	helix	N	-0.345	96.18	0.775208	1	1	0	0.52	0.12	0.345091	1	1	168.6	4.8	2	0.559322	2	0.4333	0.0051	gnomAD	Neutral	Disease	Disease	Neutral	Neutral
Ile78Met	Ile	78	Met	4	c.234C>G	coil	N	0.459	55.07	0.621558	0	0	0	0.88	0.03	-0.865668	1	1	166.7	3.8	0	0.42132	1	0.3992	0.0428	gnomAD	Neutral	Disease	Disease	Neutral	Disease
Gly86Ser	Gly	86	Ser	4	c.256G>A	coil	N	-0.947	49.98	0.681855	0	0	0	0.72	0.06	3.55003	-2	2	60.1	28.9	1	0.711538	0	0.5253	0	gnomAD	Neutral	Disease	Disease	Neutral	Disease
His91Tyr	His	91	Tyr	4	c.271C>T	strand	N	-0.569	69.31	0.552183	0	0.5	-0.5	0.78	0.02	1.04881	2	3	153.2	40.4	1	0.566964	2	0.5992	0.1211	gnomAD	Neutral	Disease	Disease	Disease	Disease
Phe92Tyr	Phe	92	Tyr	4	c.275T>A	strand	N	-0.272	63.51	0.595388	2	0	0	0.88	0.12	0.950936	2	3	189.9	3.7	1	0.441667	3	0.6124	0.0095	gnomAD	Neutral	Neutral	Neutral	Neutral	Neutral
Ser93Thr	Ser	93	Thr	4	c.278G>C	strand	N	0.332	0	0	0	0	0	0.66	0.04	0.156318	0	0	89	27.1	0	0.109677	1	0.5514	0.0041	gnomAD	Neutral	Disease	Neutral	Neutral	Neutral
Gly95Ser	Gly	95	Ser	4	c.283G>A	coil	N	0.191	6.87	0.484827	0	0	0	0.72	0.06	3.8062	-2	2	60.1	28.9	0	0.144231	0	0.5008	0.0035	gnomAD	Neutral	Disease	Disease	Neutral	Neutral
Ser98Asn	Ser	98	Asn	4	c.293G>A	helix	N	0.305	50.61	0.963816	2	0	0	0.66	0.03	-0.0710947	0	1	89	25.1	0	0.341935	1	0.4825	0.0054	gnomAD	Neutral	Neutral	Neutral	Neutral	Neutral
Asp116Gly	Asp	116	Gly	4	c.347A>G	coil	N	1.277	0	0	0	-1	1	0.62	0.1	0.662736	0	2	111.1	51	0	0.176166	-1	0.5473	0.0061	gnomAD	Neutral	Disease	Disease	Neutral	Neutral
Arg121Cys	Arg	121	Cys	5	c.361C>T	strand	N	-1.081	12.32	0.865169	2	1	-1	0.64	0.27	0.94078	0	0	173.4	64.9	1	0.0474453	-3	0.6412	0.1038	gnomAD	Disease	Neutral	Disease	Disease	Disease
Gln126Arg	Gln	126	Arg	5	c.377A>G	helix	N	0.943	0	0	0	0	1	0.62	0.02	0.264363	2	2	143.8	29.6	0	0.568889	1	0.6442	0.0068	gnomAD	Neutral	Disease	Neutral	Neutral	Neutral
Lys143Arg	Lys	143	Arg	6	c.428A>G	coil	N	0.559	0	0	0	1	0	0.52	0.12	-0.149971	1	1	168.6	4.8	0	0.631356	2	0.9141	0.0021	gnomAD	Neutral	Neutral	Neutral	Neutral	Neutral
#:The reference gene model is ENST00000598742 (NM_001022.3).
*: The meaning of this column was described in Table S7.
